# Supplementary material for: LncRNA Ctcflos orchestrates transcription and alternative splicing in thermogenic adipogenesis
Source: PubMed Central journal article supplement (PMC8256291; doi:10.15252/embr.202051289), 2021-05-31
Supplement: EMBR-22-e51289-s003.pdf [file EMBR-22-e51289-s003.pdf]

## Expanded View Figures

### Figure EV1. Regulation of protein-coding genes in brite adipogenesis, confirmation of *Ctcflos* regulation by qRT-PCR, *Ctcflos* KD effects on adipocyte lipid droplets, and mitochondrial biogenesis.

- A Heatmap of positively and negatively regulated protein-coding genes selected according to correlation with *Ucp1*, regulation during differentiation and regulation by rosiglitazone treatment.
- B, C Venn diagrams of positively and negatively regulated protein-coding genes selected according to correlation with *Ucp1*, regulation during differentiation and regulation by rosiglitazone treatment.
- D *Ctcflos* *tr1* relative RNA levels in differentiated compared to undifferentiated primary brite adipocytes of 129S6 mice, assessed by qPCR. Mean and individual values,  $n = 3$  (biological replicates), unpaired *t*-test,  $***P < 0.001$ .
- E *Ctcflos* *tr1* relative RNA levels in differentiated brite (+rosi) compared with differentiated white (–rosi) adipocytes of 129S6 mice, assessed by qPCR. Mean and individual values,  $n = 3$  (biological replicates), unpaired *t*-test,  $*P < 0.05$ .
- F Correlation of *Ctcflos* and *Ucp1* transcript levels in iBAT of C57BL/6J mice across 0, 6, 24, and 48 h of cold (4°C) exposure (transcript levels in RPKM). Individual values. Pearson correlation,  $***P < 0.001$ .
- G Protein-coding potential scores for *Ctcflos*, *Nuclear Paraspeckle Assembly Transcript 1 (Neat1)*, *Myoregulin (Mrln)*, and *Ucp1* assessed by publicly available machine-learning algorithms.
- H *In silico* translation of *Ctcflos* transcripts and alignment against the NCBI protein database to test for the putative presence of corresponding peptides.
- I Relative *Ucp1* pre-mRNA levels in response to *Ctcflos* *tr1* KD by ASO 1 compared with nontargeting control, assessed by qPCR. Mean and individual values,  $n = 2$ –3 (biological replicates).
- J Number of lipid droplets in *Ctcflos* *tr1* (ASO 1) KD compared with control cells, assessed by digital image analysis (Wimasis). Mean values  $\pm$  SD,  $n = 3$  (biological replicates), unpaired *t*-test,  $*P < 0.05$ .
- K–M Lipid droplet morphology in *Ctcflos* *tr1* KD compared with controls. (K) Lipid droplet size distribution as percentage of lipid droplets in different size categories, assessed by digital image analysis (Wimasis),  $n = 3$  (biological replicates). (L) Microscopic image section of differentiating primary brite adipocytes 72 h after *Ctcflos* *tr1* KD (lower image) or nontargeting control treatment (upper image) (day 1 diff). (M) Percentage of lipid droplets below and above 40  $\mu$ m cutoff comparing *Ctcflos* *tr1* KD and control samples. Mean values  $\pm$  SD,  $n = 3$  (biological replicates), two-way ANOVA (Šídák-test).
- N, O Oil red O staining of control and *Ctcflos* *tr1* (ASO 1) KD primary brite adipocytes 72 h after the KD at day 1 of differentiation. (N) Images of entire wells (left) of stained cells, microscopic images with 10 $\times$  objective, bars indicate 200  $\mu$ m (middle) and microscopic images with 32 $\times$  objective, bars indicate 100  $\mu$ m (right). (O) Quantification of Oil red O staining by absorbance measurement at 492 nm of stained cells subtracted by background. Mean and individual values,  $n = 3$  (technical replicates), unpaired *t*-test,  $*P < 0.05$ .
- P Quantification of Mito Tracker staining as whole image fluorescence intensity subtracted by background and normalized to cell number comparing *Ctcflos* *tr1* (ASO 1) KD and control. Mean and individual values  $n = 6$ –7 (technical replicates) the experiment was repeated a second time for a total of two biological replicates, for the second replication see (Fig 4S), unpaired *t*-test,  $**P < 0.01$ .

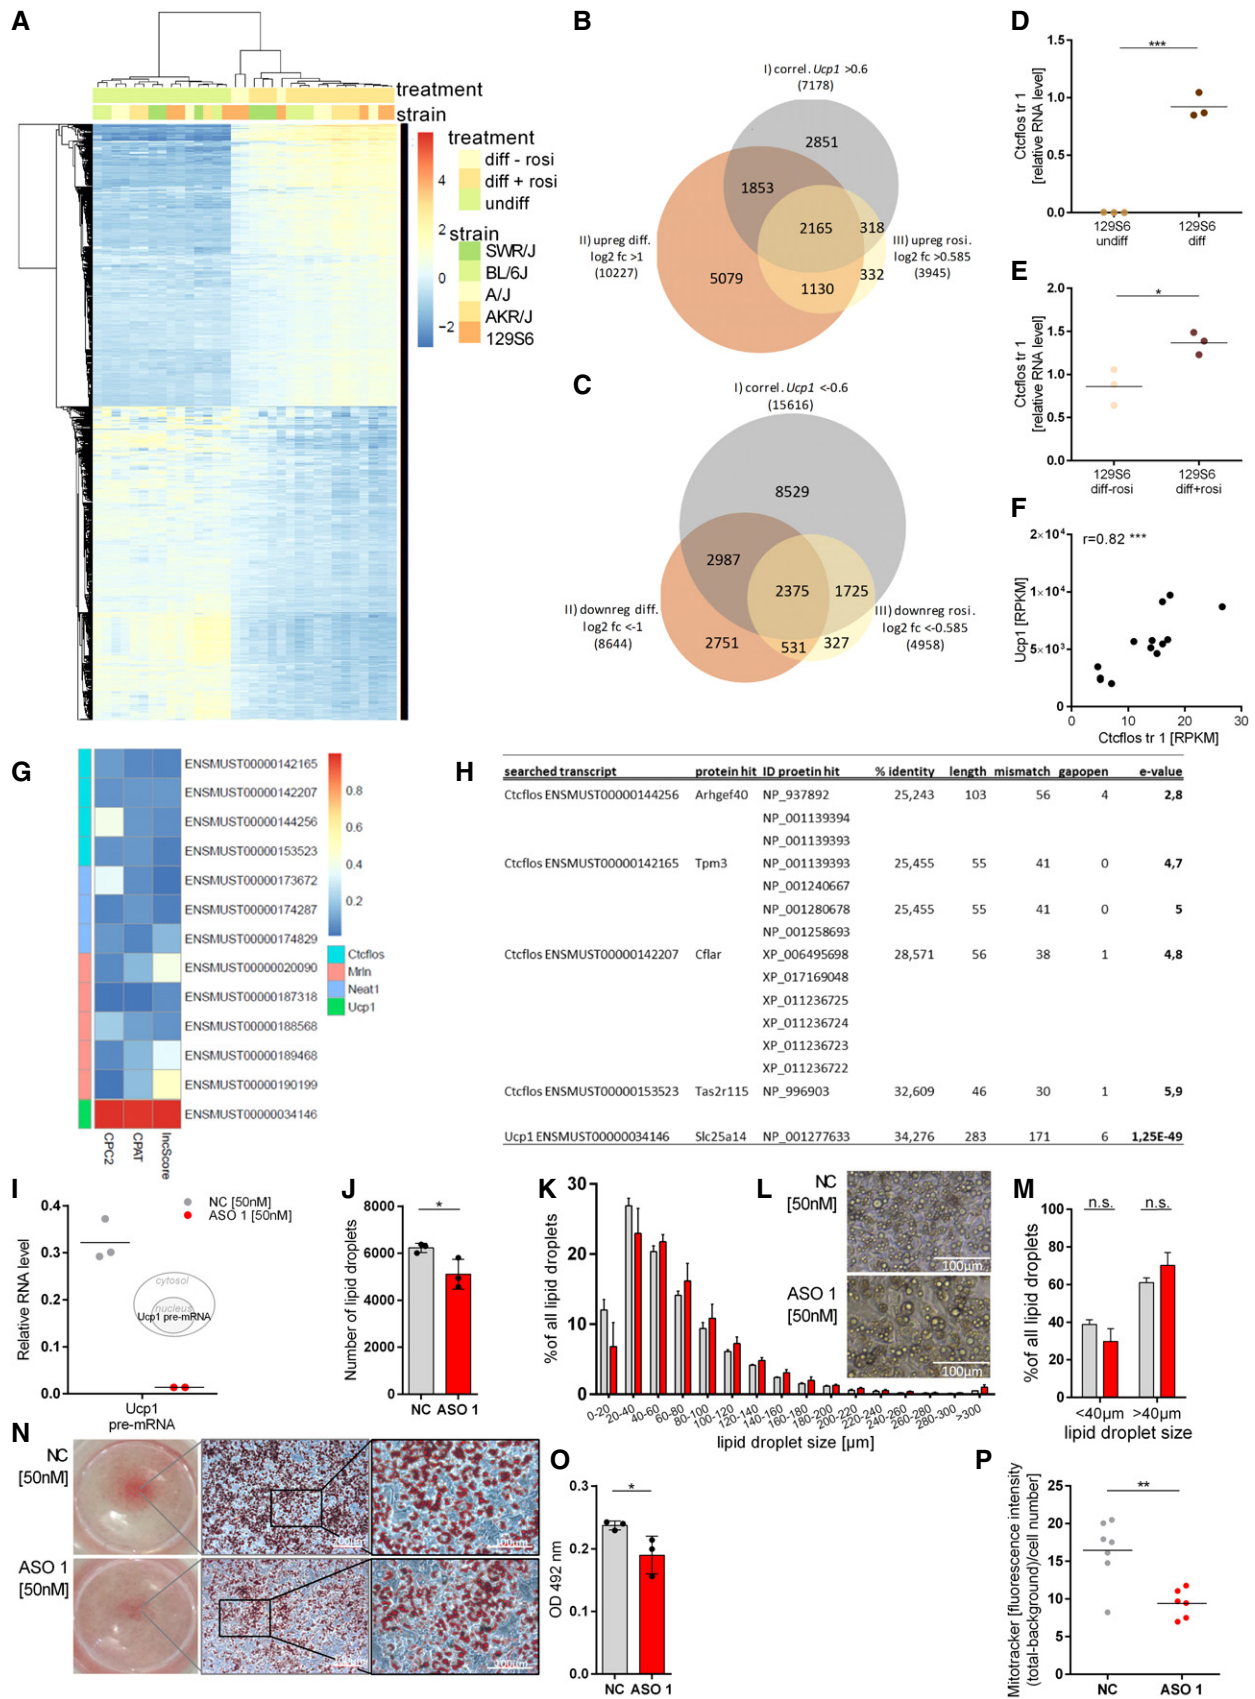

Figure EV1.

**Figure EV2. *Ctcflos* KD effects on inguinal preadipocytes, mature brite adipocytes, and differentiating brown and white adipocytes.**

- A Design of *Ctcflos* knockdown (KD) experiments in inguinal preadipocytes and mature brite adipocytes. For experiments in preadipocytes, *Ctcflos* KD was performed at sub-confluence of growing precursor cells and cells were harvested and analyzed 72 h later. For experiments in mature brite adipocytes, *Ctcflos* KD was performed at day 5 of differentiation and cells were harvested and analyzed 72 h later.
- B Relative *Ucp1* transcript levels in response to *Ctcflos* tr1 (ASO 1) KD in sub-confluent preadipocytes compared with nontargeting control, assessed by qPCR. Mean values  $\pm$  SD,  $n = 3$  (technical replicates), unpaired *t*-test,  $*P < 0.05$ .
- C–I Impact of *Ctcflos* KD on mature brite adipocytes. (C, D) Efficiency of *Ctcflos* KD by (C) LNA Gapmer ASO 1 targeting *Ctcflos* transcript 1 and (D) LNA Gapmer ASO 2 targeting *Ctcflos* transcripts 3 and 4 compared with nontargeting controls, assessed by qPCR. Mean values  $\pm$  SD,  $n = 3$  (biological replicates), unpaired *t*-tests,  $**P < 0.01$ ,  $***P < 0.001$ . (E) Relative *Ucp1* transcript levels in response to *Ctcflos* tr1 (ASO 1), 3, and 4 (ASO 2) KD compared with nontargeting controls, assessed by qPCR. Mean values  $\pm$  SD,  $n = 3$  (biological replicates), unpaired *t*-tests,  $**P < 0.01$ . (F) Relative expression levels of *cell death-inducing DNA fragmentation factor alpha-like effector A (Cidea)* and *cytochrome c oxidase subunit 7a1 (Cox7a1)* in *Ctcflos* tr1 (ASO 1), 3, and 4 (ASO 2) KD compared with control samples, assessed by qPCR. Mean and individual values,  $n = 2–3$  (biological replicates), for groups with  $n = 3$  (biological replicates): unpaired *t*-tests or in gray parenthesis two-way ANOVA (Šídák-test),  $*P < 0.05$ ,  $**P < 0.01$ ,  $***P < 0.001$ . (G–I) Effect of *Ctcflos* KD on mature brite adipocyte respiratory capacity. (G) Time course of oxygen consumption rates in mature primary brite adipocytes 72 h after treatment (day 5 diff), comparing *Ctcflos* tr1 (ASO 1), 3, and 4 (ASO 2) KD with their respective controls, measured by microplate-based respirometry (Seahorse XF96 Analyzer). Oxygen consumption is recorded under basal conditions and in response to successive injection of oligomycin (5  $\mu$ M), isoproterenol (1.5  $\mu$ M), FCCP (1  $\mu$ M) and antimycin A (5  $\mu$ M) to determine basal leak, UCP1-dependent uncoupled, maximal, and non-mitochondrial respiration, respectively. Data are expressed after deduction of non-mitochondrial respiration. Mean values  $\pm$  SD,  $n = 4$  (biological replicates). (H, I) Quantification of isoproterenol-stimulated UCP1-mediated uncoupled respiration, expressed as fold of basal leak respiration. Mean and single values, paired *t*-test,  $*P < 0.05$ ,  $**P < 0.01$ .
- J Design of *Ctcflos* knockdown (KD) experiments in differentiating interscapular brown and inguinal white adipocytes. *Ctcflos* KD was performed at the first day after induction, and cells were harvested and analyzed 72 h later.
- K–N Impact of *Ctcflos* KD on differentiating interscapular brown adipocytes. (K) Relative *Ucp1* transcript levels in response to *Ctcflos* tr1 (ASO 1), 3, and 4 (ASO 2) KD (day 1 diff) compared with nontargeting controls, assessed by qPCR. Mean values  $\pm$  SD,  $n = 3–4$  (biological replicates), unpaired *t*-tests, n.s.  $P > 0.05$ ,  $**P < 0.01$ . (L, M) Effect of *Ctcflos* KD on differentiating brown adipocyte respiratory capacity. (L) Time course of oxygen consumption rates in differentiating primary brown adipocytes 72 h after treatment (day 1 diff), comparing *Ctcflos* tr1 (ASO 1), 3, and 4 (ASO 2) KD with their respective controls, measured by microplate-based respirometry (Seahorse XF96 Analyzer) as described above for (G). Mean values,  $n = 8$  (technical replicates). (M, N) Quantification of isoproterenol-stimulated UCP1-mediated uncoupled respiration, expressed as fold of basal leak respiration. Mean and single values, paired *t*-test,  $**P < 0.01$ .
- O Impact of *Ctcflos* KD on differentiating white adipocytes. Relative expression levels of *Adipose triglyceride lipase (Atgl)* and *Hormone-sensitive lipase (Hsl)*, *Fatty acid-binding protein 4 (Fabp4)*, and *Leptin* in *Ctcflos* tr1 (ASO 1), 3, and 4 (ASO 2) KD (day 1 diff) compared with control samples, assessed by qPCR. Mean values  $\pm$  SD,  $n = 3$  (biological replicates), unpaired *t*-tests, or in gray parenthesis two-way ANOVA (Šídák-test),  $*P < 0.05$ ,  $**P < 0.01$ .
- P, Q Role of *Ctcf1* in *Ctcflos*-dependent brite adipogenesis. (P) Relative *Ctcf1* transcript levels in response to *Ctcflos* tr1 (ASO 1) KD (day 1 diff) compared with nontargeting controls, assessed by qPCR. Mean values  $\pm$  SD,  $n = 3$  (biological replicates), unpaired *t*-test, n.s.  $P > 0.05$ . (Q) Relative *Ctcf1* transcript levels in response to *Ctcf1* KD (dsi *Ctcf1*) (day 1 diff) compared with nontargeting controls and relative *Ucp1* transcript levels in response to *Ctcf1* KD (dsi *Ctcf1*) (day 1 diff) compared with nontargeting controls, assessed by qPCR. Mean values  $\pm$  SD,  $n = 3$  (biological replicates). Unpaired *t*-tests or in gray parenthesis two-way ANOVA (Šídák-test), n.s.  $P > 0.05$ ,  $*P < 0.05$ .
- R, S Role of *Pck1* in *Ctcflos*-dependent brite adipogenesis. (R) Relative *Pck1* transcript levels in response to *Ctcflos* tr1 (ASO 1) KD (day 1 diff) compared with nontargeting controls, assessed by qPCR. Mean values  $\pm$  SD,  $n = 3$  (technical replicates), unpaired *t*-test,  $***P < 0.001$ . (S) Relative *Pck1* transcript levels in response to *Pck1* KD (si *Pck1*) (day 1 diff) compared with nontargeting controls and relative *Ucp1* transcript levels in response to *Pck1* KD (si *Pck1*) (day 1 diff) compared with nontargeting controls, assessed by qPCR. Mean values  $\pm$  SD,  $n = 6$  (technical replicates). Unpaired *t*-tests, or in gray parenthesis two-way ANOVA (Šídák-test), n.s.  $P > 0.05$ ,  $****P < 0.0001$ .

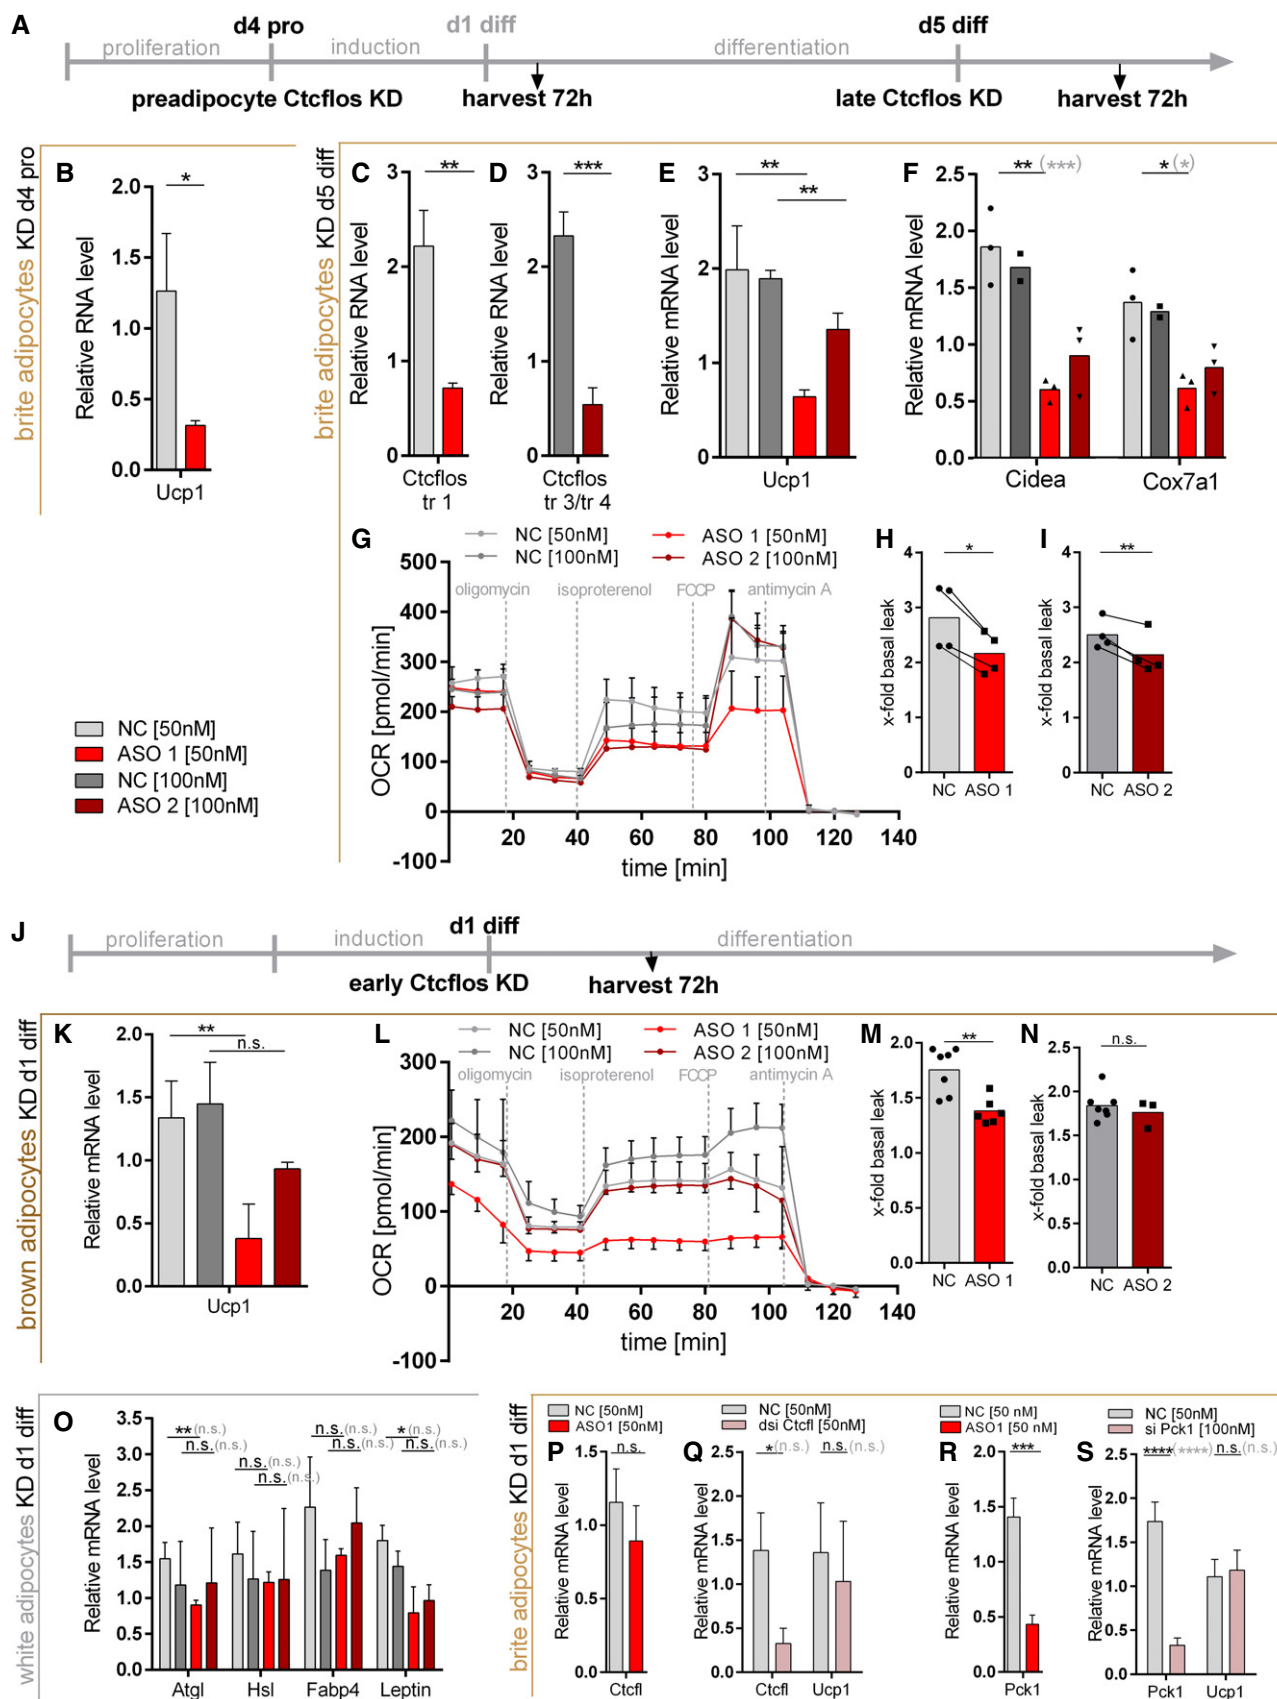

Figure EV2.

**Figure EV3. Impact of *Ctcflos* KD on mitochondrial respiratory chain, brite adipogenesis, and general adipogenesis in differentiating and mature brite cells in transcriptome profiling. Epistasis between *Ctcflos* and *Prdm16*.**

- A–C Impact of *Ctcflos* KD on differentiating brite adipocytes (KD on day 1 of differentiation) in transcriptome analysis. (A) Expression of respiratory chain complex subunits in response to *Ctcflos* tr1 (ASO1) KD (day 1 of differentiation), visualized by Path Visio software. Color code visualizes log<sub>2</sub> fold change of gene expression 72 h after the KD. (B) Relative expression levels of selected respiratory chain complex subunits. *Ctcflos* tr1 (ASO 1) and tr3 and tr4 (ASO2) KD samples relative to their nontargeting controls. *NADH:ubiquinone oxidoreductase subunit A3 (Ndufa3)*, *NADH:ubiquinone oxidoreductase core subunit S4 (Ndufs4)*, *succinate dehydrogenase complex, subunit B, iron sulfur (Sdhb)*, *ubiquinol-cytochrome c reductase, complex III subunit VII (Uqcrcq)*, *cytochrome c oxidase subunit 5B (Cox8b)*, *ATP synthase subunit E (Atp5k)*, *ATP synthase subunit s (Atp5s)*. Mean values ± SD, *n* = 6 (biological replicates), unpaired *t*-tests or in gray parenthesis two-way ANOVA (Šídák-test), \**P* < 0.05, \*\**P* < 0.01, \*\*\**P* < 0.001, \*\*\*\**P* < 0.0001, no \* indicate nonsignificant changes (not depicted in the graph due to visibility reasons). (C) Relative expression levels of general adipogenesis marker genes. *Ctcflos* tr1 (ASO 1) and tr3 and tr4 (ASO2) KD samples relative to their nontargeting controls. *Adipose triglyceride lipase (Atgl)*, *hormone-sensitive lipase (Hsl)*, *Adiponectin (AdipoQ)*, *fatty acid-binding protein 4 (Fabp4)*, *Peroxisome proliferator-activated receptor alpha (Ppara)*, *sterol regulatory element-binding transcription factor 1 (Srebf1)*, *CCAAT/enhancer-binding protein alpha (Cebpa)*. Mean values ± SD, *n* = 6 (biological replicates), unpaired *t*-tests or in gray parenthesis two-way ANOVA (Šídák-test), \**P* < 0.05, \*\**P* < 0.01, \*\*\*\**P* < 0.0001, no \* indicate nonsignificant changes (not depicted in the graph due to visibility reasons).
- D, E Impact of *Ctcflos* KD on mature brite adipocytes (KD on day 5 of differentiation) in transcriptome analysis. (D) Relative expression levels of brite adipocyte marker genes. *Ctcflos* tr1 (ASO 1), tr3 and tr4 (ASO2) KD samples relative to their nontargeting controls. *Uncoupling protein 1 (Ucp1)*, *cell death-inducing DNA fragmentation factor alpha-like effector A (Cidea)*, *cytochrome c oxidase subunit 7a1 (Cox7a1)*, *peroxisome proliferator-activated receptor  $\gamma$  coactivator 1 $\alpha$  (Pgc1a)*, and *elongation of very long chain fatty acid-like 3 (Elavl3)*. Mean values ± SD, *n* = 3 (biological replicates), unpaired *t*-tests or in gray parenthesis two-way ANOVA (Šídák-test), \**P* < 0.05, \*\**P* < 0.01, no \* indicate nonsignificant changes (not depicted in the graph due to visibility reasons). (E) Relative expression levels of general adipogenesis marker genes. *Ctcflos* tr1 (ASO 1), tr3, and tr4 (ASO2) KD samples relative to their nontargeting controls. *Atgl*, *Hsl*, *AdipoQ*, *Fabp4*, *Ppara*, *Srebf1*, and *Cebpa*. Mean values ± SD, *n* = 3 (biological replicates), unpaired *t*-tests or in gray parenthesis two-way ANOVA (Šídák-test), \**P* < 0.05, \*\**P* < 0.01, \*\*\**P* < 0.001, no \* indicate nonsignificant changes (not depicted in the graph due to visibility reasons).
- F–I Epistasis between *Ctcflos* and *Prdm16*. (F) Paired TOST equivalence test comparing *Ucp1* transcript levels of (A) *Ctcflos* single with *Ctcflos*+*Prdm16* double KD. Significance level  $\alpha$  = 0.1. Equivalence bounds based on the multiplicative gene interaction model. (G–I) Rescue of *Ctcflos* KD impact on *Ucp1* gene transcription by *Prdm16* overexpression. Primary iWAT cells untreated or infected with *Prdm16*-expressing viral particles at the second day of proliferation, followed by reverse transfection at the first day of differentiation using nontargeting control (NC) or *Ctcflos*-targeting ASO1. Gene expression analyzed 72 h later by qPCR. (G) Transcript levels of *Ctcflos* tr1 relative to *Gtf2b*. (H) Transcript levels of *Prdm16* relative to *Gtf2b*. (I) Transcript levels of *Ucp1* relative to *Gtf2b*. Mean and individual values. Each graph presents pooled data from two experiments with slightly varying virus titers. RM One-way ANOVA (Tukey test), n.s. *P* > 0.05, \**P* < 0.05, \*\**P* < 0.01.

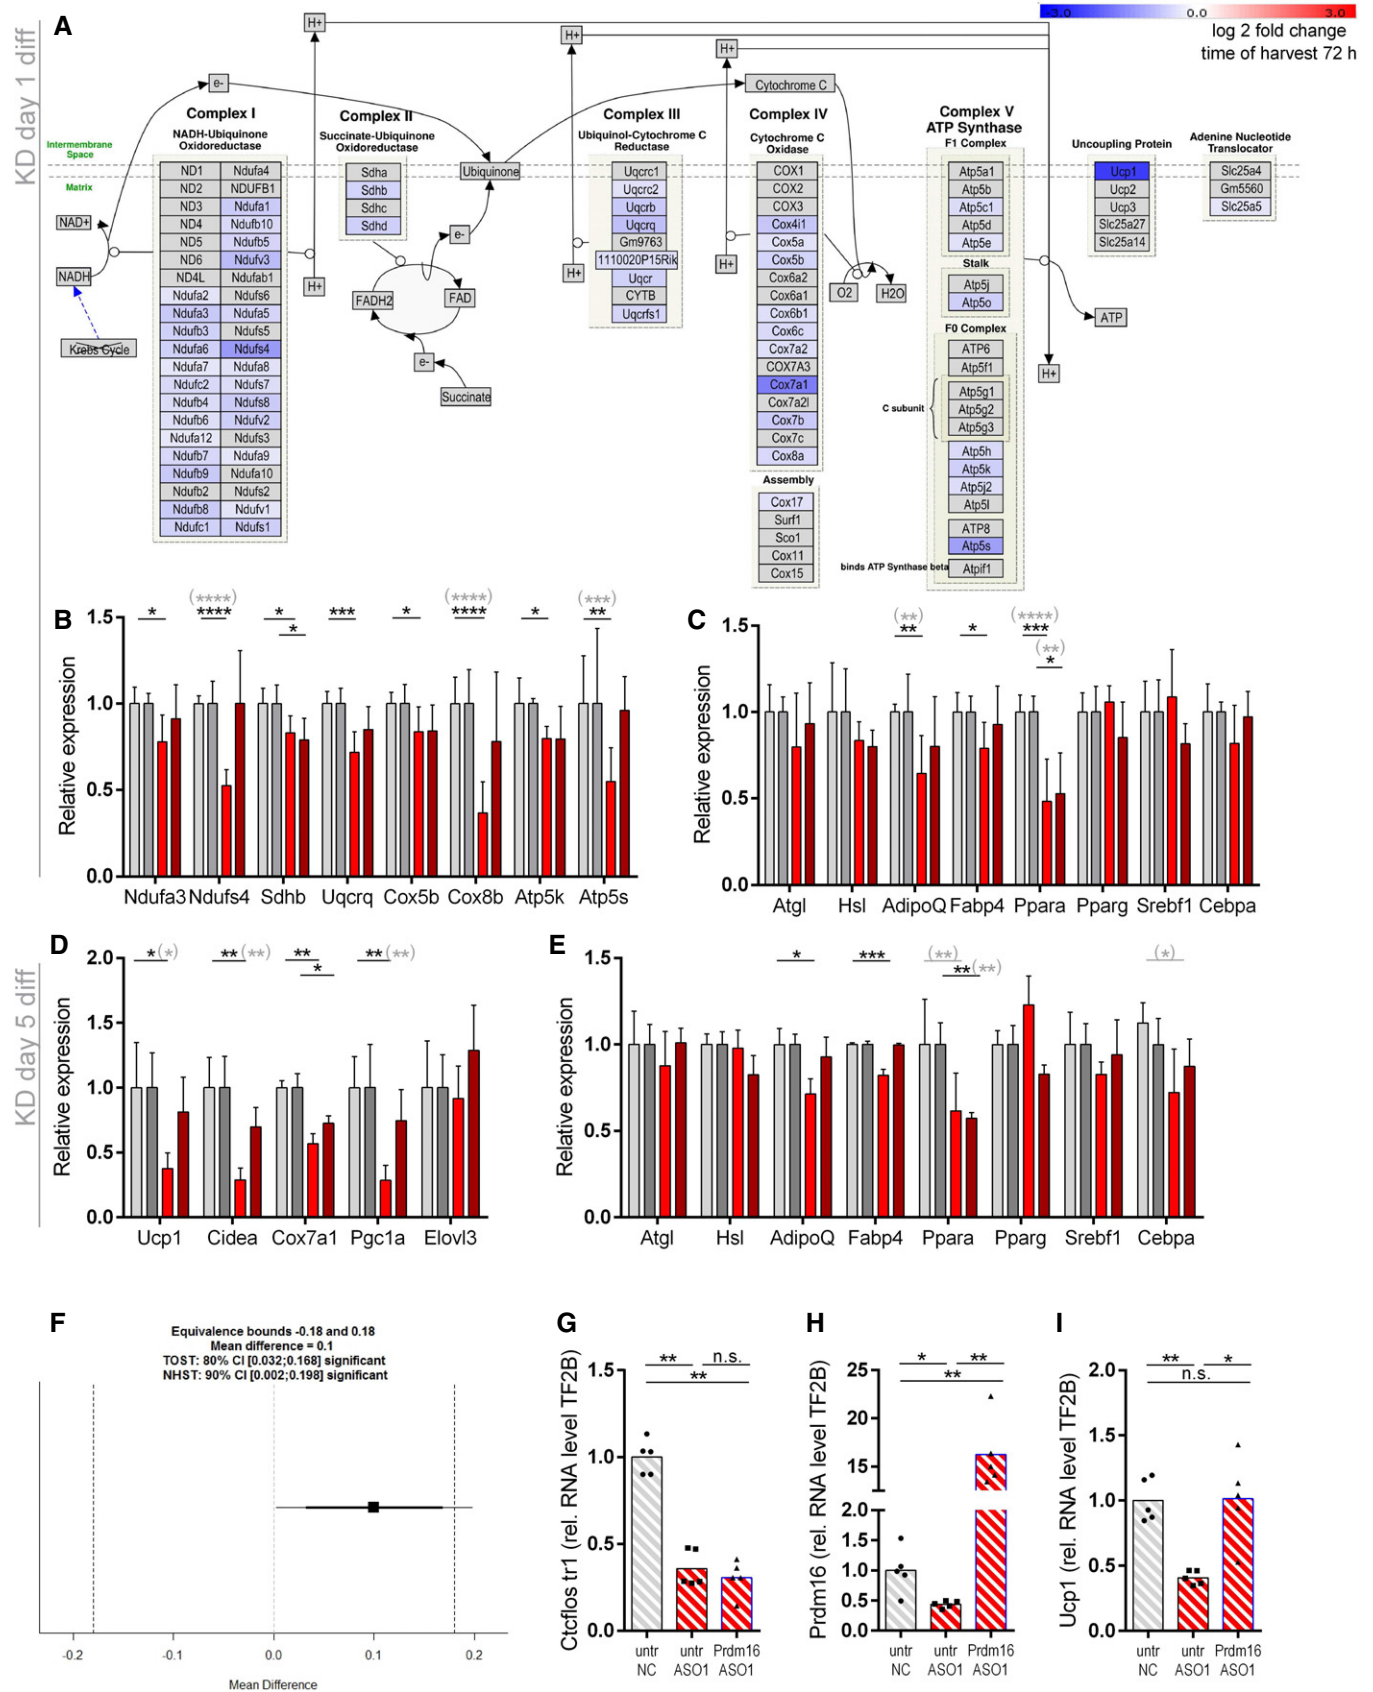

Figure EV3.

**Figure EV4. *Ctcflos* KD-dependent changes in the splicing machinery.**

- A Expression of splicing machinery components and splicing regulating factors from transcriptome profiling in response to *Ctcflos* tr1 (ASO 1) KD (KD on day 1 of differentiation), visualized by Path Visio software. Color code visualizes log<sub>2</sub> fold change in gene expression 24 h after the KD.
- B, C Quantification of SC35 fluorescence signal from immunocytochemistry as whole image fluorescence intensity subtracted by background and normalized to total cell number. Mean and individual values,  $n = 8-11$  (technical replicates) the experiment was performed for a total of three times, for the third experiment see (Fig 6F), unpaired *t*-test, \* $P < 0.05$ , \*\* $P < 0.01$ .
- D, E Quantification of nuclear speckle number from immunocytochemistry as mean number of SC35 signals per nucleus. Mean and individual values,  $n = 8-11$  (technical replicates) the experiment was performed for a total of three times, for the third experiment see (Fig 6G), unpaired *t*-test, \*\* $P < 0.01$ .
- F–Q Correlation of SC35 and UCP1 fluorescence signals in immunocytochemistry across individual cells in (F–H, L–N) control and (I–K, O–Q) *Ctcflos* tr1 (ASO 1) KD cells. (F–K) Extreme values are included. (L–Q) Extreme values were excluded to avoid distortion of correlation analysis. Additional three replicates to (Fig 6F and G). Pearson correlation, \* $P < 0.05$ , \*\* $P < 0.01$ , \*\*\*\* $P < 0.0001$ .

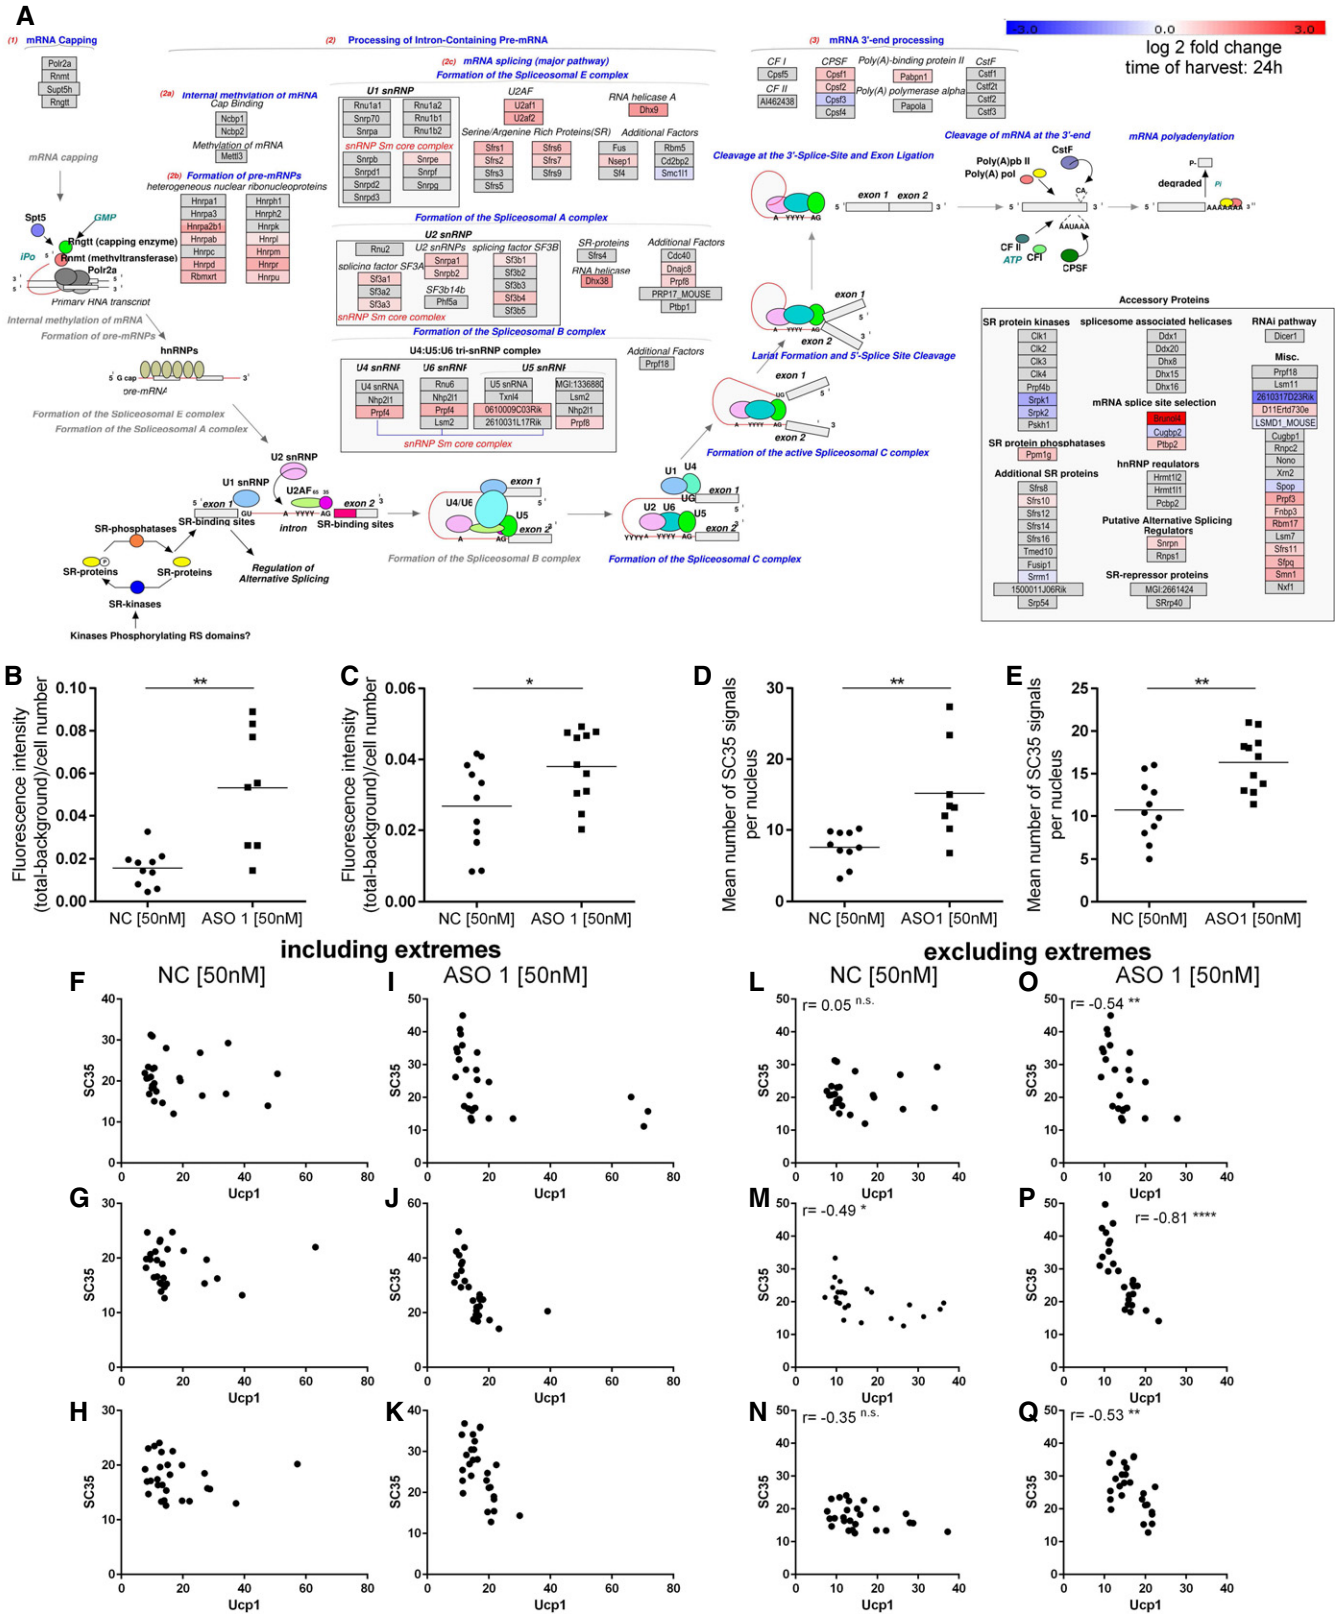

Figure EV4.



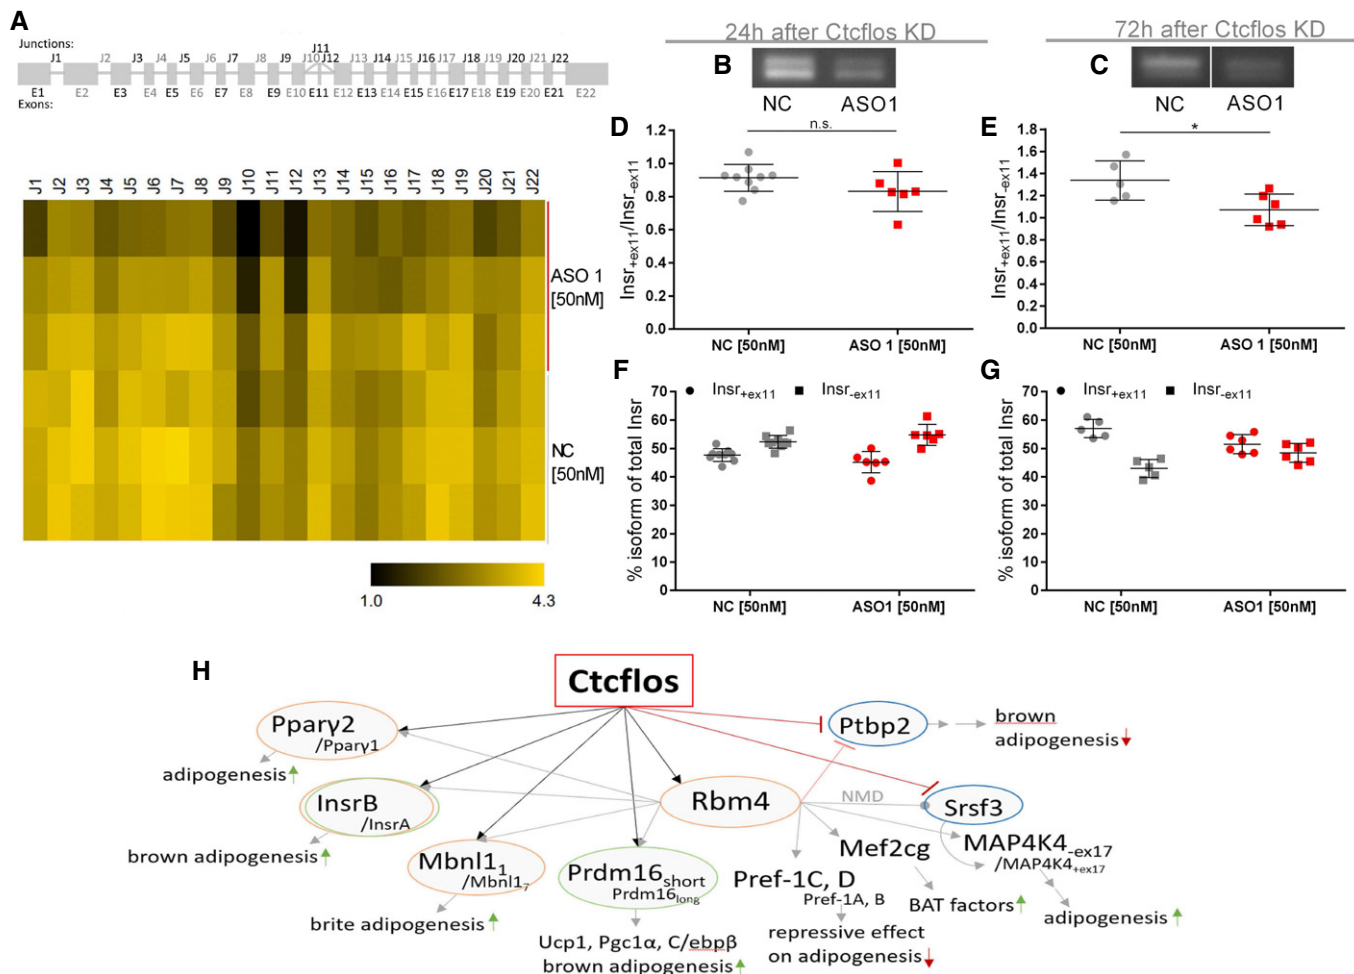

**Figure EV5. Ctcfls KD-dependent changes in alternative splicing of *Insr*.**

**A** Splice graph (upper panel) and exon junction heatmap (lower panel) of *Insulin receptor (Insr)* comparing *Ctcfls* tr1 (ASO 1) KD and controls in transcriptome wide splicing analysis by SGSeq algorithm (Goldstein et al, 2016). The splice graph displays *Insr* exons and alternative exon junctions. In the heatmap, usage of exon junctions is quantified from junction spanning reads for *Ctcfls* tr1 (ASO 1) KD and controls.

**B, C** PCR gel pictures of *Insr*<sub>+ex11</sub> (upper band) and *Insr*<sub>-ex11</sub> (lower band) in control and *Ctcfls* tr1 (ASO 1) KD samples, (B) 24 h or (C) 72 h after the KD.

**D, E** Ratio of *Insr*<sub>+ex11</sub> to *Insr*<sub>-ex11</sub> in control and *Ctcfls* tr1 (ASO 1) KD samples, (D) 24 h or (E) 72 h after the KD quantified from PCR signals. Mean and individual values, *n* = 5–9 (technical replicates), unpaired *t*-test, n.s. *P* > 0.05 \**P* < 0.05.

**F, G** Percentage of *Insr*<sub>+ex11</sub> and *Insr*<sub>-ex11</sub> of total *Insr* in control and *Ctcfls* tr1 (ASO 1) KD samples, (F) 24 h or (G) 72 h after the KD quantified from PCR signals. Mean and individual values, *n* = 5–9 (technical replicates).

**H** Reported targets of RBM4 regulated alternative splicing and transcription in brown adipose tissue (Lin et al, 2014; Lin, 2015; Chi & Lin, 2018; Peng et al, 2018; Hung & Lin, 2019). Yellow circles mark genes that were identified by deep sequencing to be differentially spliced also by *Ctcfls* tr1 (ASO 1) KD compared with control samples, green circles mark genes for which *Ctcfls*-dependent alternative splicing was confirmed experimentally, and blue circles highlight genes that are transcriptionally regulated by *Ctcfls*.

Source data are available online for this figure.
