# Supplementary material for: LncRNA Ctcflos orchestrates transcription and alternative splicing in thermogenic adipogenesis
Source: PubMed Central journal article supplement (PMC8256291; doi:10.15252/embr.202051289), 2021-05-31
Supplement: EMBR-22-e51289-s006.pdf [file EMBR-22-e51289-s006.pdf]

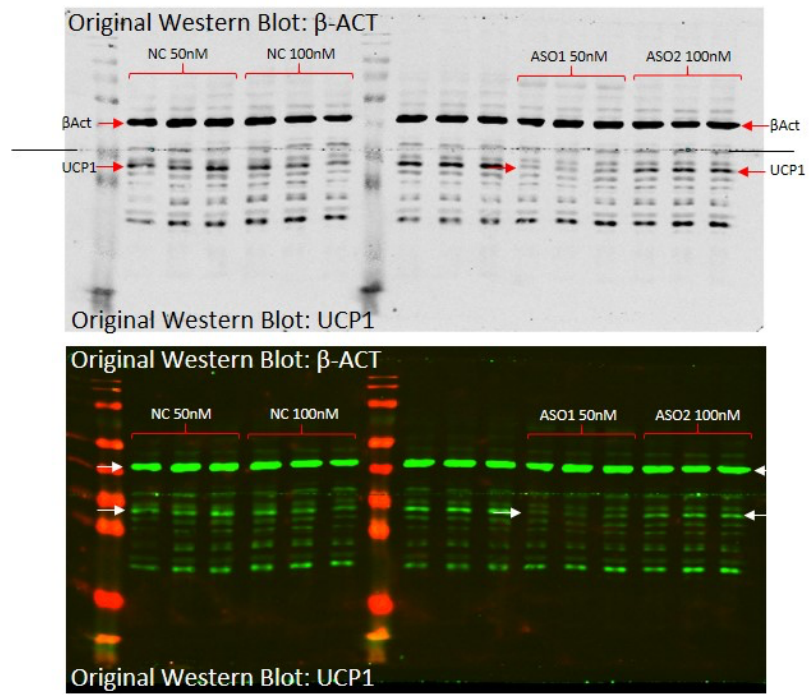

Figure 4G

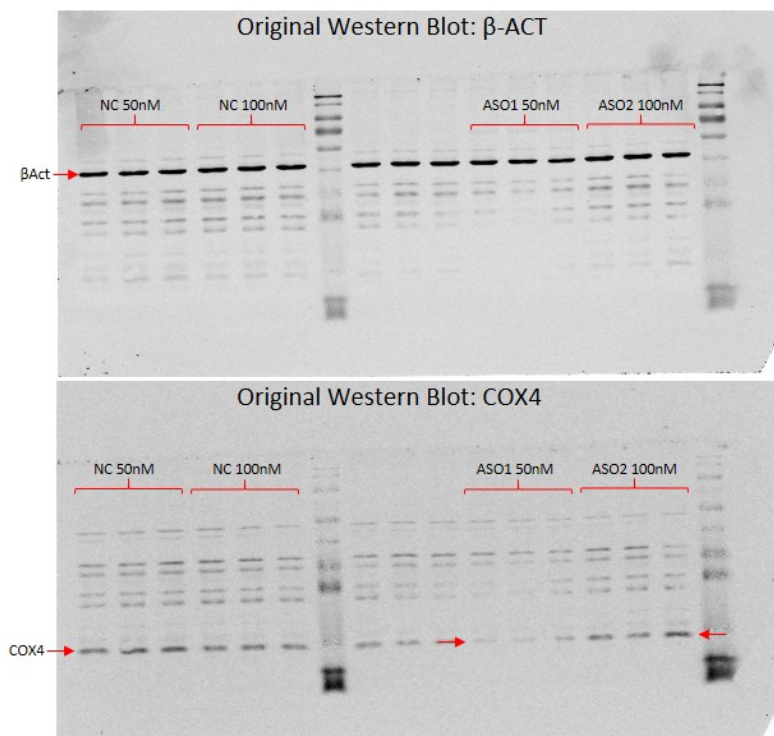

Figure 4Q
